# Supplementary material
Source: publisher figshare collection journal article supplement (https://acs.figshare.com/ndownloader/files/4406977)
Supplement: Supplementary file 1 [file 4406977]

## **Supporting Information**

### **Hybrid Supercapacitor Based on Coaxially Coated Manganese Oxide on Vertically Aligned Carbon Nanofiber Arrays**

Jianwei Liu, Jeremy Essner, and Jun Li\*

*Department of Chemistry, Kansas State University, Manhattan, KS 66506*

E-mail: [junli@ksu.edu](mailto:junli@ksu.edu) Fax: (785) 5326666; Tel: (785) 5320955

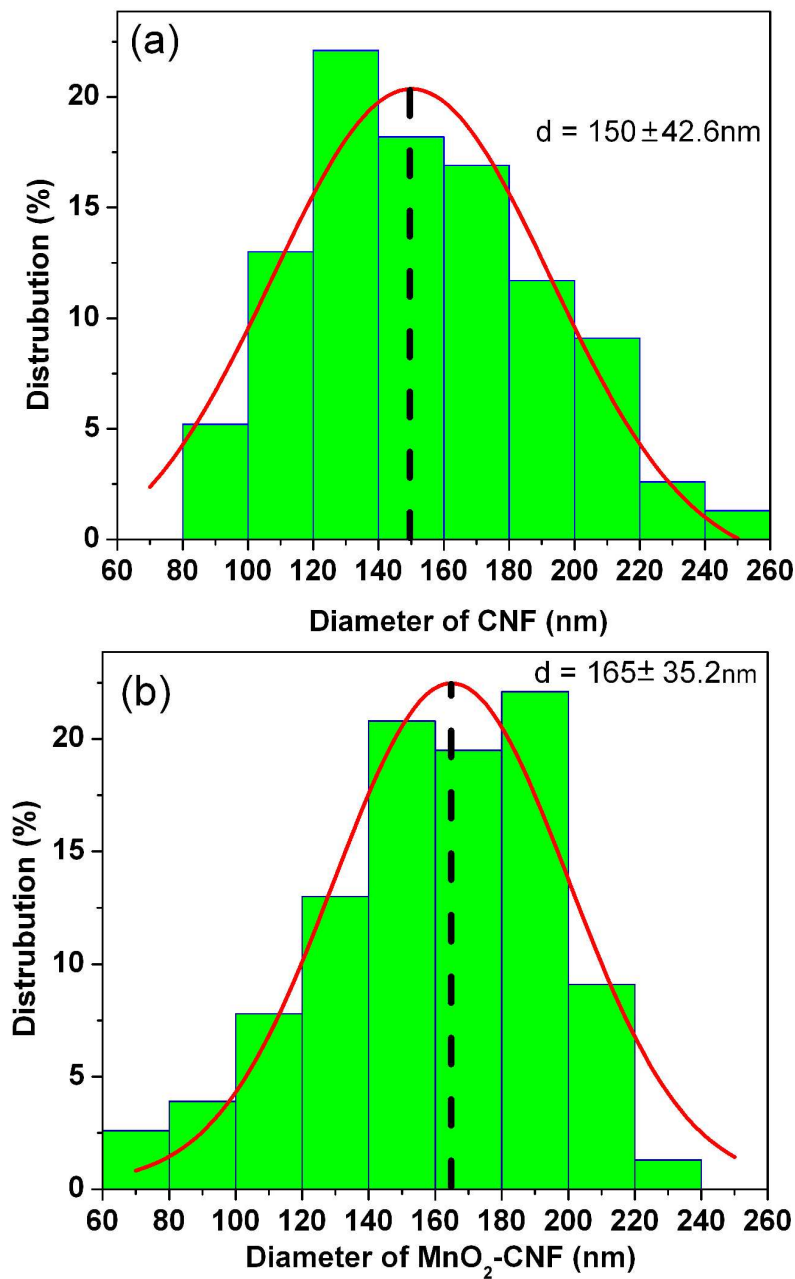

**Figure S1.** Histograms of the distribution of the outer diameter of carbon nanofibers in a bare acid-treated VACNF array (a) and the same sample after 20 minutes of Manganese Oxide deposition (b). Both histograms are fit with a gaussian distribution with the mean diameter and standard deviation shown in the figure.

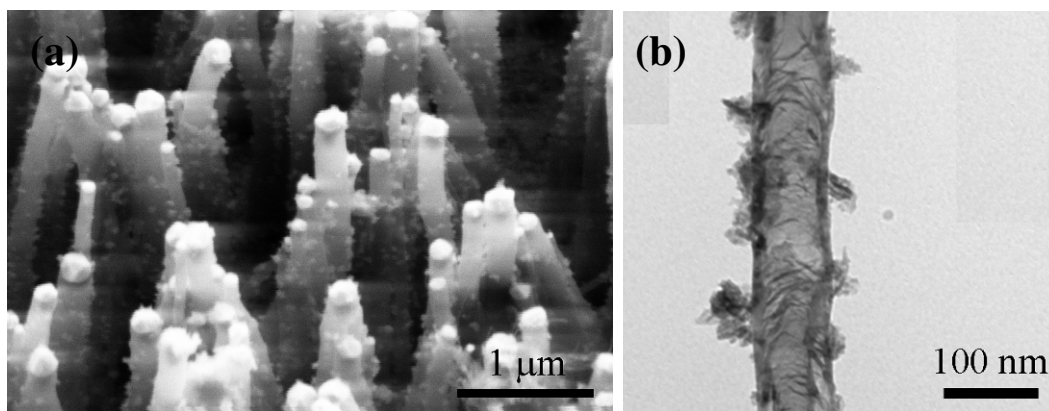

**Figure S2.** SEM and TEM images of an as-grown VACNF array directly coated with MnO<sub>2</sub> with 26 minutes of electrodeposition time without going through the acid treatment.

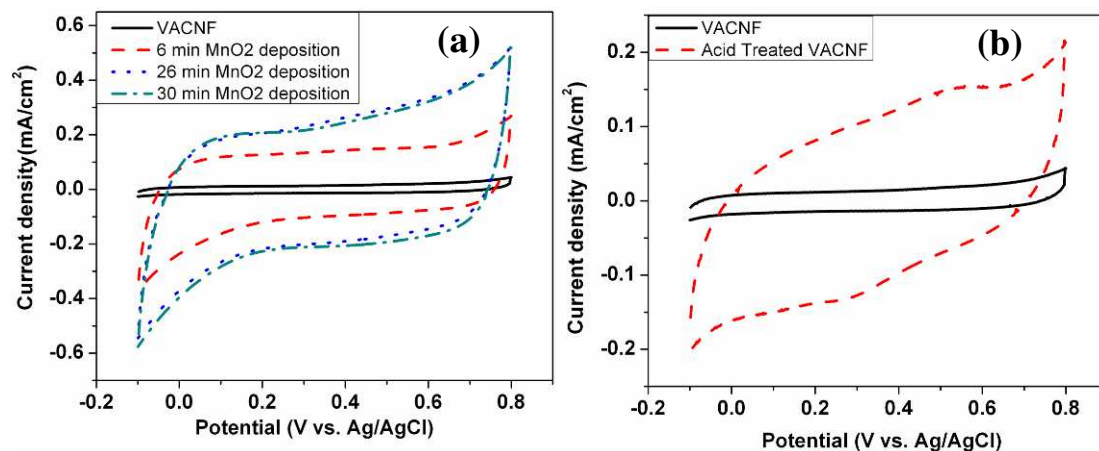

**Figure S3.** (a) Cyclic voltammograms of an as-grown VACNF arrays without subjecting to acid treatment and this sample after deposited with  $\text{MnO}_2$  at various deposition time. (b) Cyclic voltammograms of bare VACNF arrays with and without acid treatment.

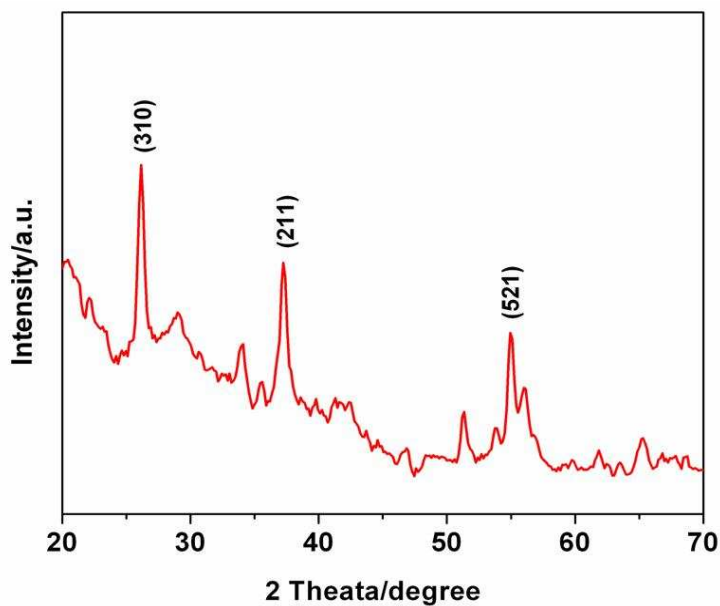

**Figure S4.** X-ray diffraction of the electrochemically deposited manganese oxide after annealing in the air at  $200\text{ }^{\circ}\text{C}$ . All reflections can be indexed as a pure tetragonal phase of  $\alpha\text{-MnO}_2$  with lattice constants  $a = 0.9784\text{ nm}$  and  $c = 0.2863\text{ nm}$  (JCPDS 44-0141).

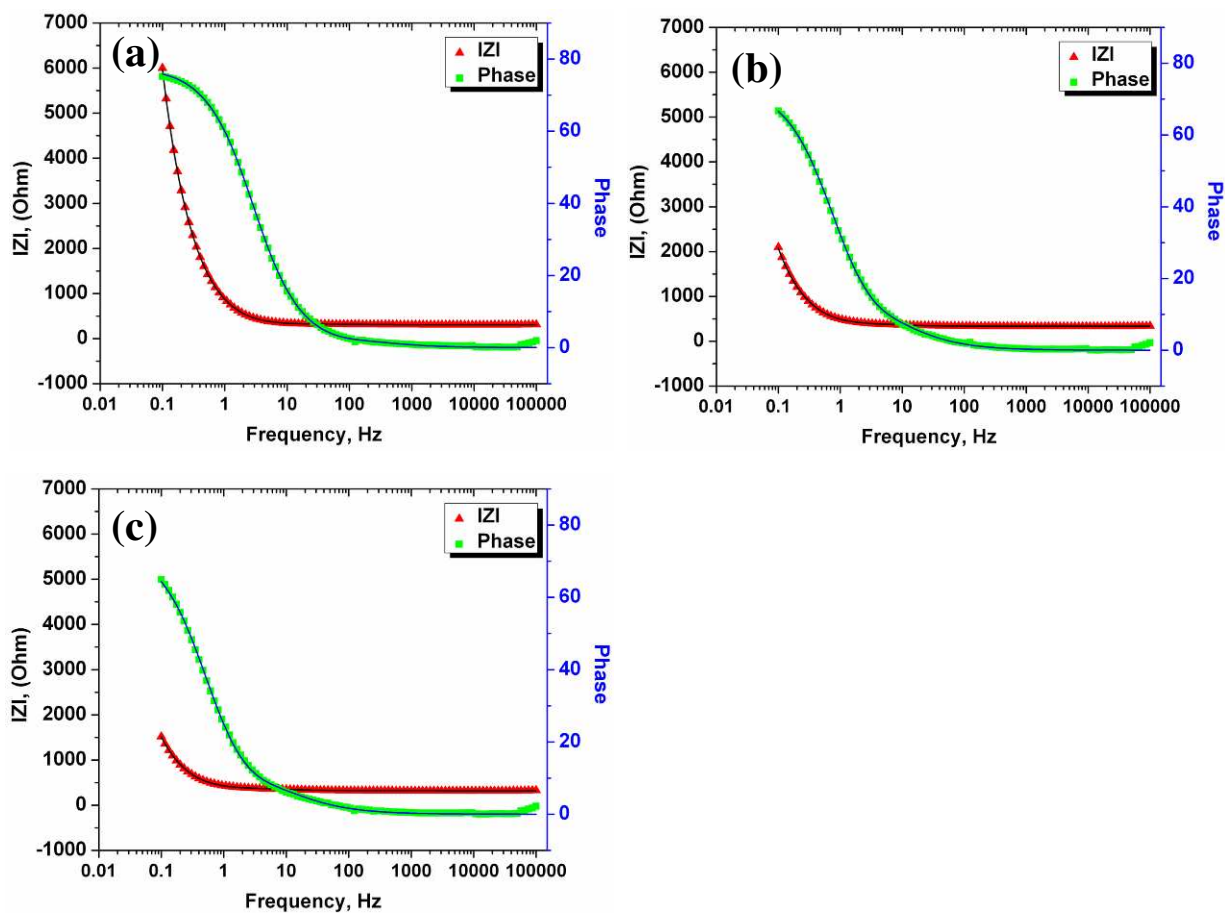

**Figure S5.** Bode plots of an acid-treated VACNF array (a) and similar samples after 6 minutes of  $MnO_2$  deposition (b) and 20 minutes of  $MnO_2$  deposition (c).

**Table SI** Fitting parameters of electrochemical impedance spectra for the acid-treated VACNF arrays

| Sample conditions               | $R_s$<br>(Ohm) | CPE      |          | $R_{ct}$<br>(Ohm) | C<br>(F) |
|---------------------------------|----------------|----------|----------|-------------------|----------|
|                                 |                | Y (Ohm)  | $\alpha$ |                   |          |
| Acid-treated VACNF              | 306.6          | 1.649E-4 | 0.8119   | 28.78             | 9.19E-5  |
| After 6 min $MnO_2$ deposition  | 333.5          | 5.501E-4 | 0.7912   | 202.6             | 2.105E-4 |
| After 20 min $MnO_2$ deposition | 319.1          | 6.591E-4 | 0.7734   | 154.6             | 4.161E-4 |

Note:

The employed equivalent circuit is shown in Fig. 5.

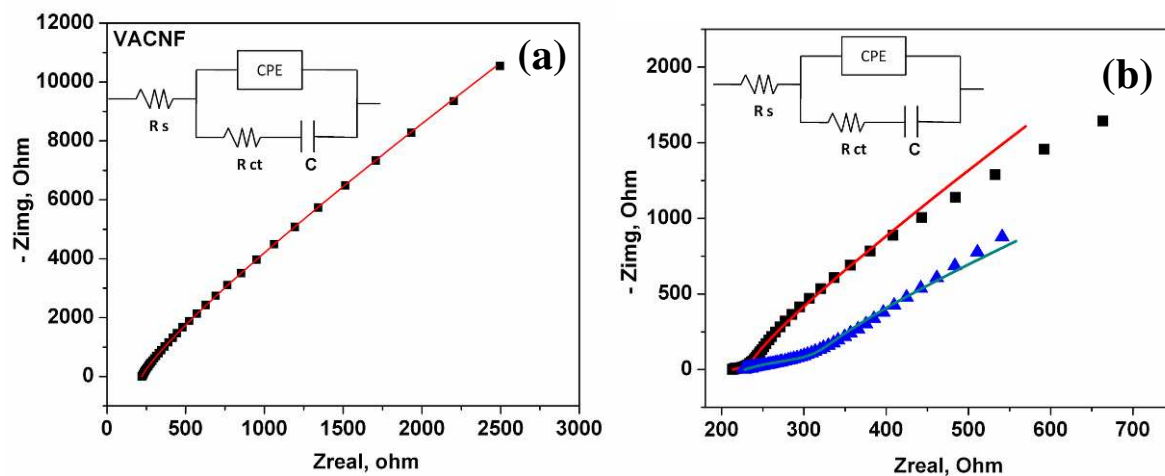

**Figure S6.** Nyquist plot and fitting of electrochemical impedance spectra of samples without going through acid treatments: (a) an as-grown VACNF array, (b) a VACNF array after 6 minutes of MnO<sub>2</sub> deposition (filled square), and (c) a VACNF array after 26 minutes of MnO<sub>2</sub> deposition (filled triangle).

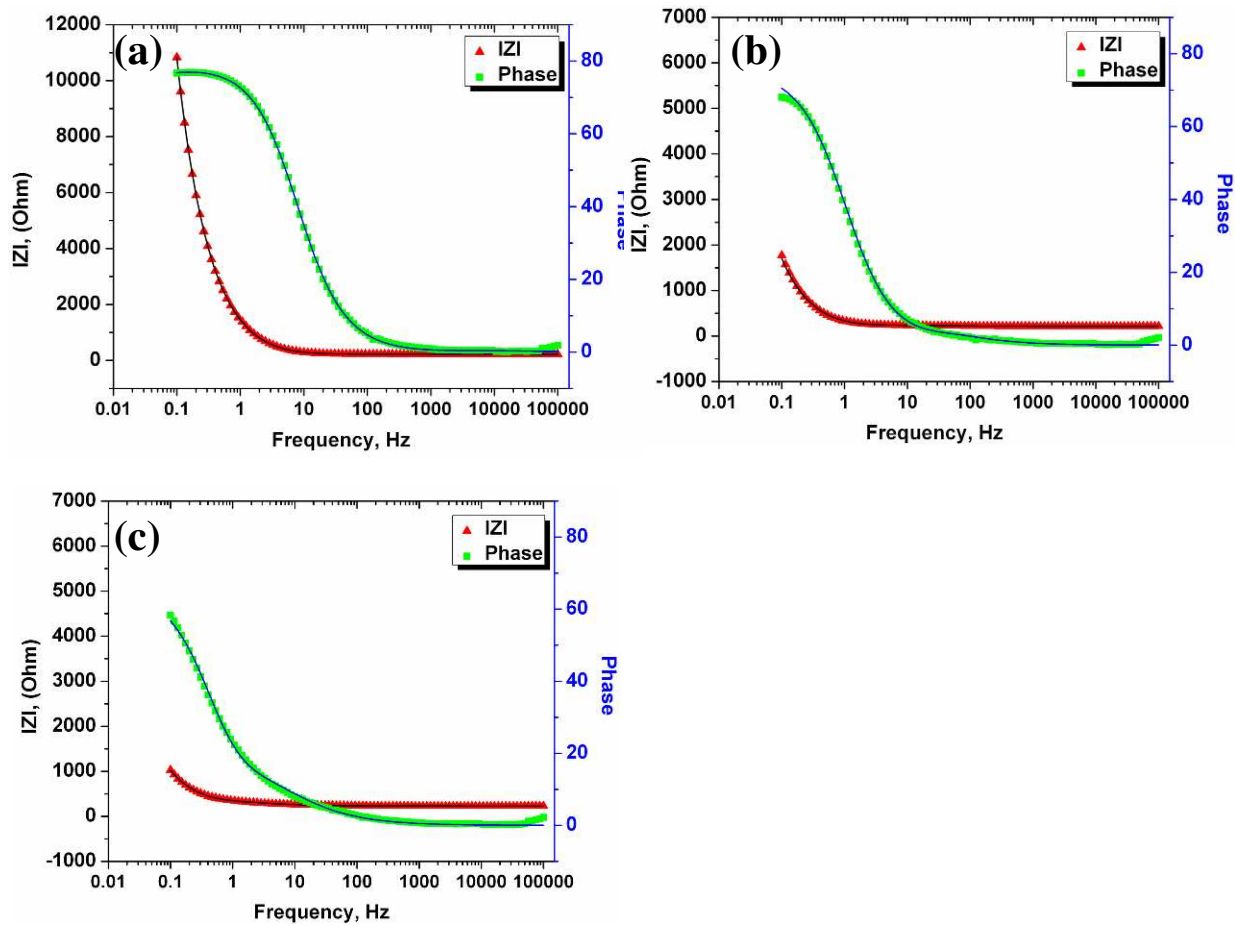

**Figure S7.** Bode plots of as-grown VACNF array (a), after 6 min  $\text{MnO}_2$  deposition (b), after 26 min  $\text{MnO}_2$  deposition (c).

**Table SII** Fitting parameters of electrochemical impedance spectra for the non-treated VACNF arrays

| Sample conditions                      | $R_s$<br>(Ohm) | CPE      |          | $R_{ct}$<br>(Ohm) | C<br>(F) |
|----------------------------------------|----------------|----------|----------|-------------------|----------|
|                                        |                | Y (Ohm)  | $\alpha$ |                   |          |
| Non-treated VACNF                      | 219.8          | 7.032E-5 | 0.745    | 4.427             | 7.156E-5 |
| After 6 min $\text{MnO}_2$ deposition  | 213.6          | 5.101E-4 | 0.656    | 38.19             | 4.13E-4  |
| After 26 min $\text{MnO}_2$ deposition | 228            | 1.047E-3 | 0.6841   | 275.7             | 5.684E-4 |

Note:

The employed equivalent circuit is shown in Fig. S5.
